# Supplementary material for: Avoidance of biological contaminants through sight, smell and touch in chimpanzees
Source: R Soc Open Sci. 2017 Nov 8;4(11):170968. doi: 10.1098/rsos.170968 (PMC5717664; doi:10.1098/rsos.170968)
Supplement: Sarabian data olfactory ESM [file rsos170968supp4.csv]

ind	group	age	sex	rank	trial	smell	feed	leave	audience
aboume	6	36	m	high	1	blood	1	0	1
adanhe	2	15	m	low	1	blood	1	1	1
amelie	2	38	f	low	1	blood	1	1	1
ayrton	5	22	m	low	1	blood	1	1	0
benefice	4	49	f	low	1	blood	1	0	0
charles	4	30	m	high	1	blood	1	1	1
chiquita	2	38	f	low	1	blood	1	1	1
fifi	4	22	f	low	1	blood	1	1	1
judy	5	39	f	high	1	blood	1	0	0
lalala	3	36	f	high	1	blood	1	1	1
leconi	3	14	m	high	1	blood	1	0	1
makata	5	34	m	low	1	blood	1	0	0
makoku	2	36	f	high	1	blood	1	1	1
masuku	2	38	f	low	1	blood	1	0	1
mebale	4	29	f	low	1	blood	1	0	1
mgbado	5	32	m	high	1	blood	1	1	0
moanda	1	37	m	low	1	blood	1	0	1
morphee	4	37	f	high	1	blood	1	1	0
ntoum	1	26	m	low	1	blood	0	1	1
vaillant	4	37	m	low	1	blood	1	1	0
aboume	6	36	m	high	2	blood	1	1	1
adanhe	2	15	m	low	2	blood	1	1	1
amelie	2	38	f	low	2	blood	1	1	1
ayrton	5	22	m	low	2	blood	1	0	0
benefice	4	49	f	low	2	blood	1	0	0
charles	4	30	m	high	2	blood	1	1	1
chiquita	2	38	f	low	2	blood	0	1	1
fifi	4	22	f	low	2	blood	1	0	1
judy	5	39	f	high	2	blood	1	0	0
lalala	3	36	f	high	2	blood	1	1	1
leconi	3	14	m	high	2	blood	1	0	1
makata	5	34	m	low	2	blood	1	0	1
makoku	2	36	f	high	2	blood	1	1	1
masuku	2	38	f	low	2	blood	1	0	1
mebale	4	29	f	low	2	blood	1	1	1
mgbado	5	32	m	high	2	blood	1	0	1
moanda	1	37	m	low	2	blood	1	1	1
morphee	4	37	f	high	2	blood	1	0	1
ntoum	1	26	m	low	2	blood	NA	NA	NA
vaillant	4	37	m	low	2	blood	1	0	0
aboume	6	36	m	high	3	blood	1	0	1
adanhe	2	15	m	low	3	blood	1	0	1
amelie	2	38	f	low	3	blood	1	0	1
ayrton	5	22	m	low	3	blood	1	0	1
benefice	4	49	f	low	3	blood	1	1	1
charles	4	30	m	high	3	blood	0	1	1
chiquita	2	38	f	low	3	blood	1	0	0
fifi	4	22	f	low	3	blood	1	1	1
judy	5	39	f	high	3	blood	1	0	0
lalala	3	36	f	high	3	blood	1	1	0
leconi	3	14	m	high	3	blood	1	0	1
makata	5	34	m	low	3	blood	1	1	0
makoku	2	36	f	high	3	blood	1	1	1
masuku	2	38	f	low	3	blood	1	1	0
mebale	4	29	f	low	3	blood	1	1	1
mgbado	5	32	m	high	3	blood	1	0	1
moanda	1	37	m	low	3	blood	1	1	1
morphee	4	37	f	high	3	blood	1	0	0
ntoum	1	26	m	low	3	blood	0	1	0
vaillant	4	37	m	low	3	blood	1	0	0
aboume	6	36	m	high	1	water	1	0	1
adanhe	2	15	m	low	1	water	0	1	1
amelie	2	38	f	low	1	water	1	1	1
ayrton	5	22	m	low	1	water	1	0	1
benefice	4	49	f	low	1	water	1	0	1
charles	4	30	m	high	1	water	1	0	1
chiquita	2	38	f	low	1	water	1	0	1
fifi	4	22	f	low	1	water	1	0	1
judy	5	39	f	high	1	water	1	0	1
lalala	3	36	f	high	1	water	1	0	0
leconi	3	14	m	high	1	water	1	0	1
makata	5	34	m	low	1	water	1	0	1
makoku	2	36	f	high	1	water	1	0	1
masuku	2	38	f	low	1	water	1	1	1
mebale	4	29	f	low	1	water	1	0	0
mgbado	5	32	m	high	1	water	1	0	1
moanda	1	37	m	low	1	water	1	0	0
morphee	4	37	f	high	1	water	1	0	0
ntoum	1	26	m	low	1	water	1	1	0
vaillant	4	37	m	low	1	water	1	0	1
aboume	6	36	m	high	2	water	1	0	1
adanhe	2	15	m	low	2	water	0	1	0
amelie	2	38	f	low	2	water	1	1	1
ayrton	5	22	m	low	2	water	1	1	1
benefice	4	49	f	low	2	water	1	0	1
charles	4	30	m	high	2	water	1	1	0
chiquita	2	38	f	low	2	water	1	1	1
fifi	4	22	f	low	2	water	1	1	1
judy	5	39	f	high	2	water	1	1	0
lalala	3	36	f	high	2	water	1	1	1
leconi	3	14	m	high	2	water	1	0	1
makata	5	34	m	low	2	water	1	1	1
makoku	2	36	f	high	2	water	1	0	1
masuku	2	38	f	low	2	water	1	0	1
mebale	4	29	f	low	2	water	1	1	1
mgbado	5	32	m	high	2	water	1	0	1
moanda	1	37	m	low	2	water	1	0	1
morphee	4	37	f	high	2	water	1	0	1
ntoum	1	26	m	low	2	water	1	1	0
vaillant	4	37	m	low	2	water	1	0	0
aboume	6	36	m	high	3	water	1	1	1
adanhe	2	15	m	low	3	water	0	1	0
amelie	2	38	f	low	3	water	1	0	0
ayrton	5	22	m	low	3	water	1	0	1
benefice	4	49	f	low	3	water	1	0	1
charles	4	30	m	high	3	water	1	1	1
chiquita	2	38	f	low	3	water	1	1	0
fifi	4	22	f	low	3	water	1	0	0
judy	5	39	f	high	3	water	1	0	1
lalala	3	36	f	high	3	water	1	1	1
leconi	3	14	m	high	3	water	1	1	1
makata	5	34	m	low	3	water	1	0	1
makoku	2	36	f	high	3	water	1	0	0
masuku	2	38	f	low	3	water	1	0	1
mebale	4	29	f	low	3	water	1	0	1
mgbado	5	32	m	high	3	water	1	0	1
moanda	1	37	m	low	3	water	1	1	0
morphee	4	37	f	high	3	water	1	0	0
ntoum	1	26	m	low	3	water	0	1	0
vaillant	4	37	m	low	3	water	1	0	0
aboume	6	36	m	high	1	feces	0	1	1
adanhe	2	15	m	low	1	feces	1	1	1
amelie	2	38	f	low	1	feces	1	1	1
ayrton	5	22	m	low	1	feces	1	0	1
benefice	4	49	f	low	1	feces	1	0	1
charles	4	30	m	high	1	feces	0	1	1
chiquita	2	38	f	low	1	feces	0	1	1
fifi	4	22	f	low	1	feces	1	1	1
judy	5	39	f	high	1	feces	1	0	0
lalala	3	36	f	high	1	feces	0	1	1
leconi	3	14	m	high	1	feces	1	0	1
makata	5	34	m	low	1	feces	1	1	1
makoku	2	36	f	high	1	feces	1	0	1
masuku	2	38	f	low	1	feces	1	1	1
mebale	4	29	f	low	1	feces	1	0	0
mgbado	5	32	m	high	1	feces	1	0	1
moanda	1	37	m	low	1	feces	1	0	1
morphee	4	37	f	high	1	feces	1	1	1
ntoum	1	26	m	low	1	feces	1	0	0
vaillant	4	37	m	low	1	feces	1	0	0
aboume	6	36	m	high	2	feces	1	0	1
adanhe	2	15	m	low	2	feces	0	1	1
amelie	2	38	f	low	2	feces	0	1	1
ayrton	5	22	m	low	2	feces	1	0	0
benefice	4	49	f	low	2	feces	1	0	1
charles	4	30	m	high	2	feces	1	1	1
chiquita	2	38	f	low	2	feces	0	1	1
fifi	4	22	f	low	2	feces	1	0	1
judy	5	39	f	high	2	feces	1	0	1
lalala	3	36	f	high	2	feces	1	1	1
leconi	3	14	m	high	2	feces	1	0	1
makata	5	34	m	low	2	feces	1	1	0
makoku	2	36	f	high	2	feces	1	0	1
masuku	2	38	f	low	2	feces	1	0	1
mebale	4	29	f	low	2	feces	1	1	1
mgbado	5	32	m	high	2	feces	1	1	0
moanda	1	37	m	low	2	feces	1	0	1
morphee	4	37	f	high	2	feces	1	1	0
ntoum	1	26	m	low	2	feces	1	0	0
vaillant	4	37	m	low	2	feces	1	0	0
aboume	6	36	m	high	3	feces	0	1	1
adanhe	2	15	m	low	3	feces	0	0	0
amelie	2	38	f	low	3	feces	1	0	0
ayrton	5	22	m	low	3	feces	1	0	0
benefice	4	49	f	low	3	feces	1	0	1
charles	4	30	m	high	3	feces	1	1	1
chiquita	2	38	f	low	3	feces	0	1	0
fifi	4	22	f	low	3	feces	1	1	1
judy	5	39	f	high	3	feces	1	0	0
lalala	3	36	f	high	3	feces	1	1	1
leconi	3	14	m	high	3	feces	1	0	1
makata	5	34	m	low	3	feces	1	1	0
makoku	2	36	f	high	3	feces	1	0	1
masuku	2	38	f	low	3	feces	1	1	1
mebale	4	29	f	low	3	feces	1	1	1
mgbado	5	32	m	high	3	feces	1	1	1
moanda	1	37	m	low	3	feces	1	0	1
morphee	4	37	f	high	3	feces	1	0	0
ntoum	1	26	m	low	3	feces	1	1	0
vaillant	4	37	m	low	3	feces	1	0	0
aboume	6	36	m	high	1	semen	1	1	1
adanhe	2	15	m	low	1	semen	0	1	1
amelie	2	38	f	low	1	semen	1	1	1
ayrton	5	22	m	low	1	semen	1	1	1
benefice	4	49	f	low	1	semen	1	0	1
charles	4	30	m	high	1	semen	1	0	0
chiquita	2	38	f	low	1	semen	0	1	1
fifi	4	22	f	low	1	semen	1	1	0
judy	5	39	f	high	1	semen	1	1	0
lalala	3	36	f	high	1	semen	1	1	1
leconi	3	14	m	high	1	semen	1	0	0
makata	5	34	m	low	1	semen	0	1	1
makoku	2	36	f	high	1	semen	1	1	1
masuku	2	38	f	low	1	semen	1	1	1
mebale	4	29	f	low	1	semen	1	0	0
mgbado	5	32	m	high	1	semen	1	0	0
moanda	1	37	m	low	1	semen	1	1	1
morphee	4	37	f	high	1	semen	1	1	0
ntoum	1	26	m	low	1	semen	1	1	0
vaillant	4	37	m	low	1	semen	1	0	0
aboume	6	36	m	high	2	semen	1	0	1
adanhe	2	15	m	low	2	semen	1	1	1
amelie	2	38	f	low	2	semen	1	1	1
ayrton	5	22	m	low	2	semen	1	0	1
benefice	4	49	f	low	2	semen	1	0	1
charles	4	30	m	high	2	semen	1	1	1
chiquita	2	38	f	low	2	semen	0	1	1
fifi	4	22	f	low	2	semen	1	0	1
judy	5	39	f	high	2	semen	1	0	0
lalala	3	36	f	high	2	semen	1	1	1
leconi	3	14	m	high	2	semen	1	0	0
makata	5	34	m	low	2	semen	1	0	0
makoku	2	36	f	high	2	semen	1	0	1
masuku	2	38	f	low	2	semen	1	0	1
mebale	4	29	f	low	2	semen	1	1	1
mgbado	5	32	m	high	2	semen	1	1	1
moanda	1	37	m	low	2	semen	1	0	1
morphee	4	37	f	high	2	semen	1	0	1
ntoum	1	26	m	low	2	semen	1	1	1
vaillant	4	37	m	low	2	semen	1	0	0
aboume	6	36	m	high	3	semen	1	1	1
adanhe	2	15	m	low	3	semen	NA	NA	NA
amelie	2	38	f	low	3	semen	1	1	1
ayrton	5	22	m	low	3	semen	1	0	1
benefice	4	49	f	low	3	semen	1	0	1
charles	4	30	m	high	3	semen	1	0	1
chiquita	2	38	f	low	3	semen	1	0	1
fifi	4	22	f	low	3	semen	1	1	1
judy	5	39	f	high	3	semen	1	0	1
lalala	3	36	f	high	3	semen	1	1	1
leconi	3	14	m	high	3	semen	1	0	1
makata	5	34	m	low	3	semen	1	0	0
makoku	2	36	f	high	3	semen	1	0	1
masuku	2	38	f	low	3	semen	1	1	1
mebale	4	29	f	low	3	semen	1	1	0
mgbado	5	32	m	high	3	semen	1	1	0
moanda	1	37	m	low	3	semen	1	1	1
morphee	4	37	f	high	3	semen	1	0	1
ntoum	1	26	m	low	3	semen	0	1	0
vaillant	4	37	m	low	3	semen	1	0	0
